# Supplementary material for: A new and facile preparation of 3D urchin-like TiO2@graphene core@shell SERS substrates for photocatalytic degradation of RhB
Source: Royal Society of Chemistry journal article supplement (doi:10.1039/d5ma00040h), 2025-01-01
Supplement: d5ma00040h1.pdf [file d5ma00040h1.pdf]

## **A new and facile preparation of 3D urchin-like TiO<sub>2</sub>@graphene core@shell SERS substrates for photocatalytic degradation of RhB**

Nguyen Thi Huyen<sup>a,b</sup>, Tran Ai Suong Suong<sup>c</sup>, Cao Thi Thanh<sup>a</sup>, Pham Van Trinh<sup>a</sup>, Nguyen Van Tu<sup>a</sup>, Bui Hung Thang<sup>a</sup>, Tran Van Hau<sup>a</sup>, Pham Thanh Binh<sup>a</sup>, Vu Duc Chinh<sup>a</sup>, Pham Van Hai<sup>d,e</sup>, Vu Xuan Hoa<sup>f</sup>, Tran Van Tan<sup>g</sup>, Phan Ngoc Minh<sup>b</sup>, Hiroya Abe<sup>h</sup>, and Nguyen Van Chuc<sup>a,b\*</sup>

<sup>a</sup>Institute of Materials Science, Vietnam Academy of Science and Technology, 18 Hoang Quoc Viet, Cau Giay, Hanoi, Vietnam

<sup>b</sup>Graduate University of Science and Technology, Vietnam Academy of Science and Technology, 18 Hoang Quoc Viet, Cau Giay, Hanoi, Vietnam

<sup>c</sup>VNU University of Engineering and Technology, 144 Xuan Thuy, Cau Giay, Hanoi, Vietnam

<sup>d</sup>Faculty of Physics, Hanoi National University of Education, 136 Xuan Thuy, Cau Giay, Hanoi, Vietnam

<sup>e</sup>Institute of Natural Sciences, Hanoi National University of Education, 136 Xuan Thuy, Cau Giay, Hanoi, Vietnam

<sup>f</sup>Institute of Science and Technology, TNU-University of Sciences (TNUS), Tan Thinh ward, Thai Nguyen city, Vietnam

<sup>g</sup>Faculty of Physics, University of Science, Vietnam National University, Hanoi, 334 Nguyen Trai, Thanh Xuan, Hanoi, Vietnam

<sup>h</sup>Joining and Welding Research Institute, Osaka University, Osaka 5670047, Japan

\* Corresponding author at: Institute of Materials Science, Vietnam Academy of Science and Technology, 18 Hoang Quoc Viet, Cau Giay, Hanoi, Vietnam.

chucnv@ims.vast.vn (N.V. Chuc)

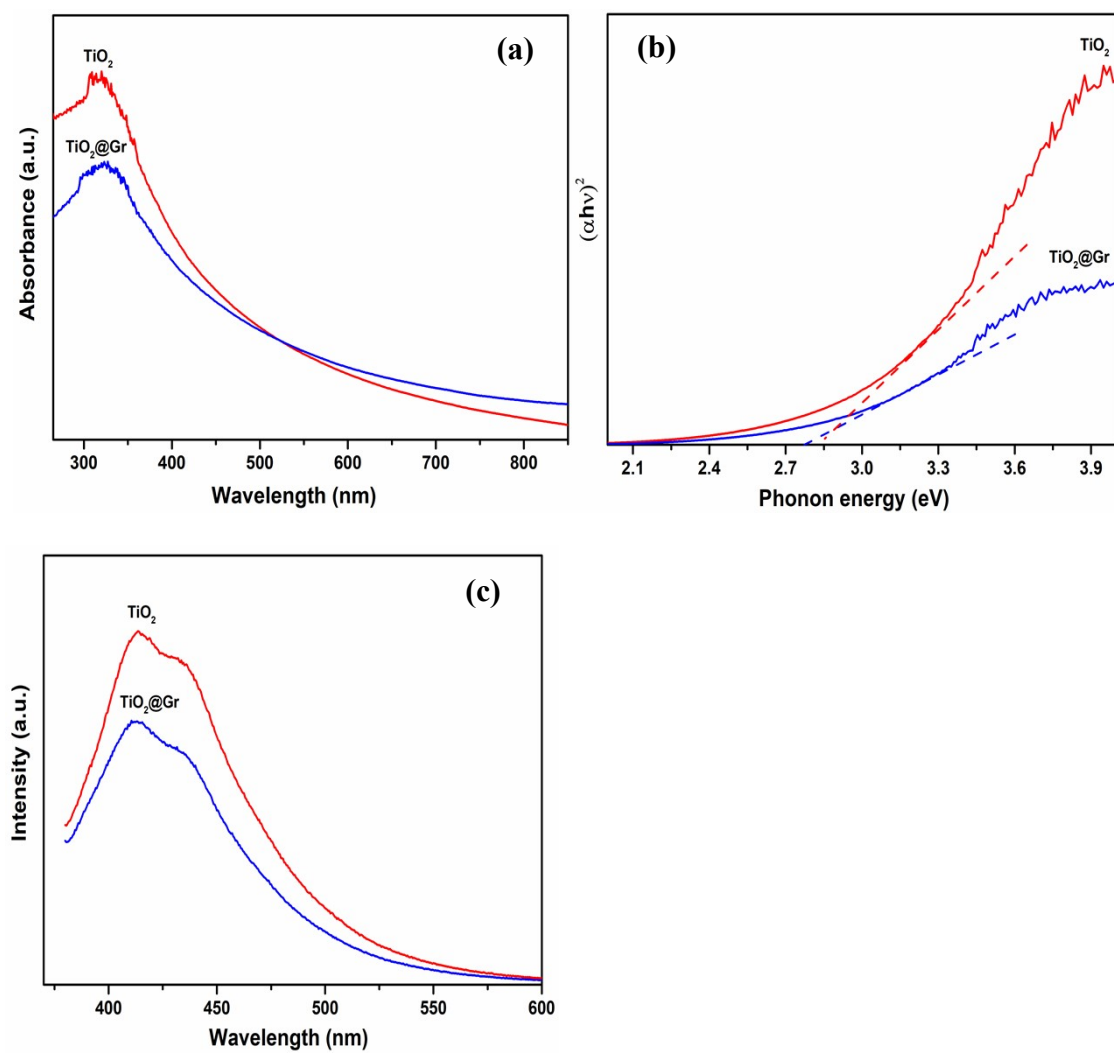

**Fig. S1** (a) UV-Vis absorption spectra, (b) optical band gap, and (c) PL emission spectra of UT and UTG samples.

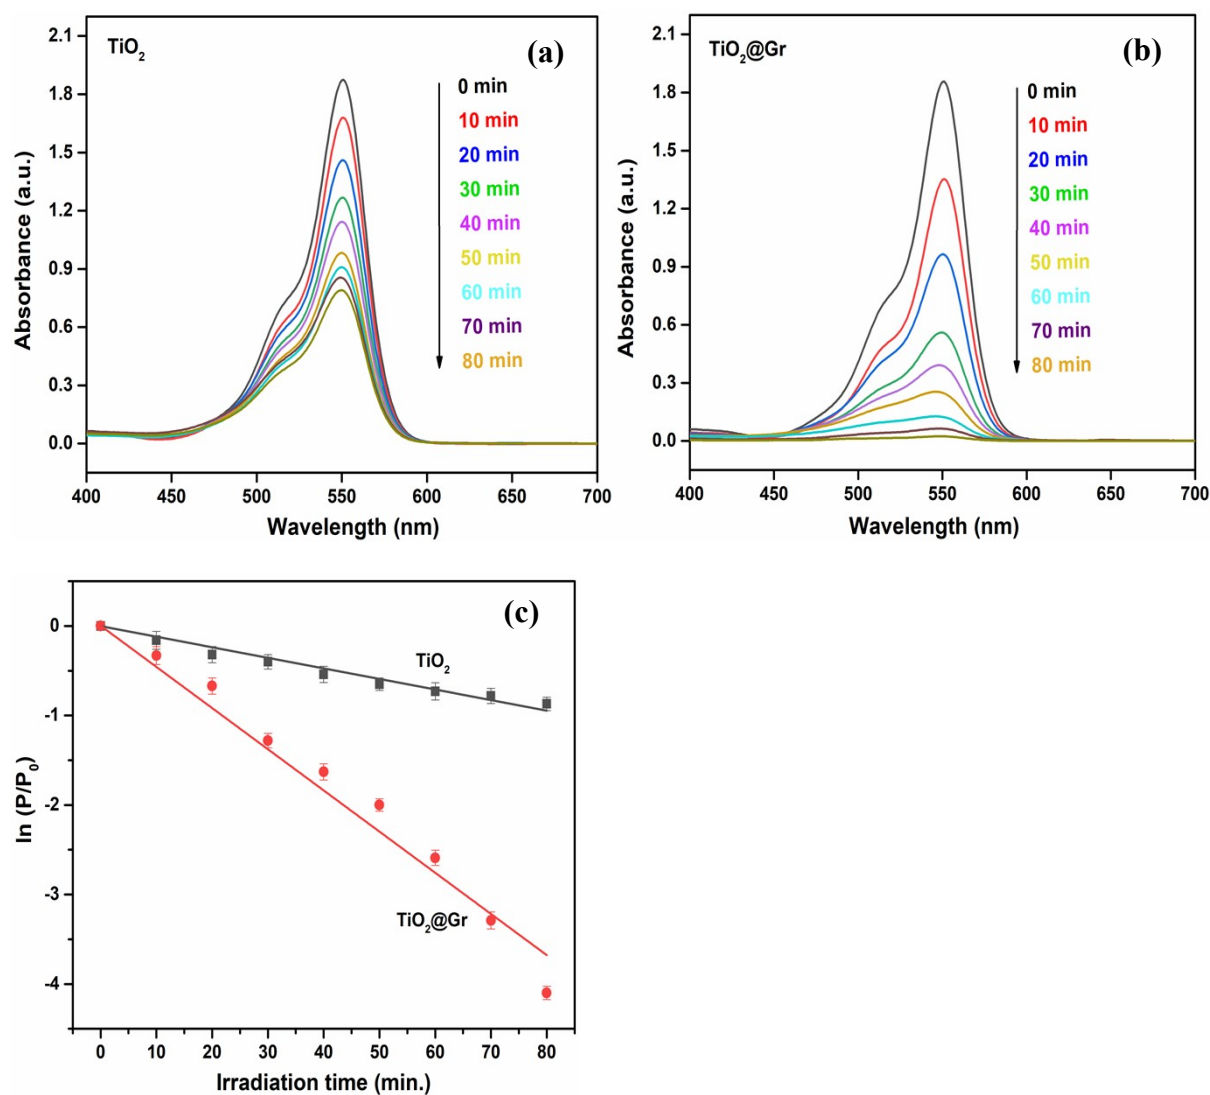

**Fig. S2** (a, b) UV-Vis absorbance spectra and (c) linear relation between logarithm of peak intensities ( $\ln (P/P_0)$ ) at 550 nm versus irradiation time (min) for the degradation of RhB in the presence of UT and UTG samples.

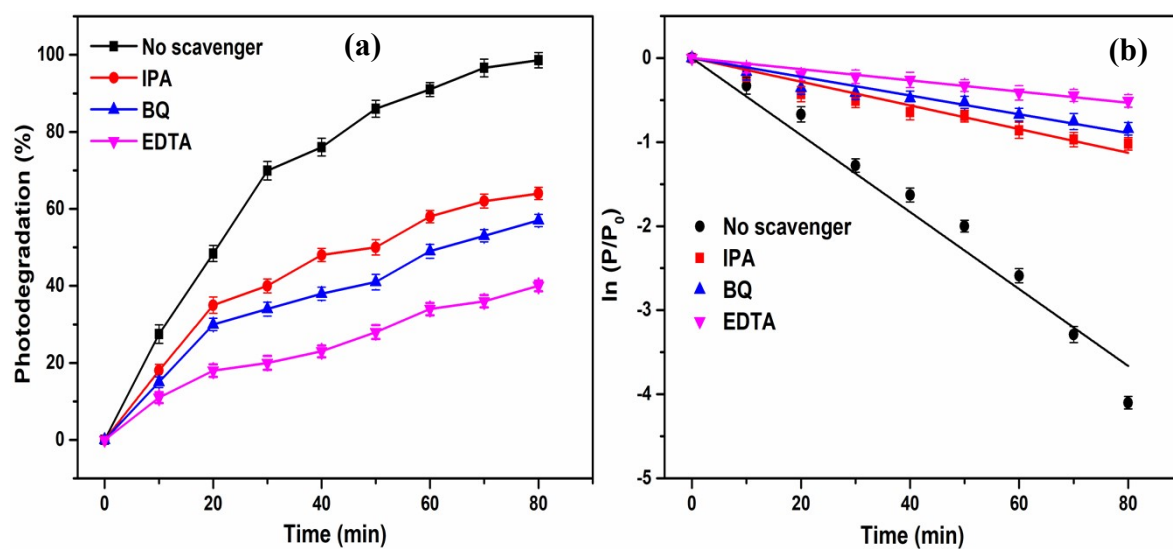

**Fig. S3** (a) Trapping experiment of three radical scavengers in RhB photodegradation by UTG sample, (b) kinetic photodegradation of three radical scavengers.
